# Supplementary material for: Muscle mass, strength and functional outcomes in critically ill patients after cardiothoracic surgery: does neuromuscular electrical stimulation help? The Catastim 2 randomized controlled trial
Source: Springer Nature journal article supplement (doi:10.1186/s13054-016-1199-3), 2016-01-29
Supplement: MOESM3 [file 9781012]

**Additional File 3.** Linear mixed models for quadriceps mean MRC<sup>a</sup>

**Table S1A.** Linear mixed model for quadriceps mean MRC from the first postoperative day for a maximum of 14 postoperative days (51 patients, 219 observations)

Days of ICU and hospital discharge, where no NMES was applied anymore, were excluded in this model.

|                                   | Estimate of quadriceps mean MRC in points <sup>a</sup> (95% CI) | <i>P</i> value |
|-----------------------------------|-----------------------------------------------------------------|----------------|
| Intercept                         | 4.22 (3.90 to 4.54)                                             | < .001         |
| Postoperative day                 | -0.01 (-0.06 to 0.04)                                           | .63            |
| Control group                     | reference                                                       | .              |
| NMES group                        | -0.62 (-1.08 to -0.16)                                          | .009           |
| Postoperative day × Control group | reference                                                       | .              |
| Postoperative day × NMES group    | 0.11 (0.05 to 0.18)                                             | < .001         |

**Table S1B.** Linear mixed model for quadriceps mean MRC on four important study days (51 patients, 130 observations)

|                         | Estimate of quadriceps mean MRC in points <sup>a</sup> (95% CI) | <i>P</i> value |
|-------------------------|-----------------------------------------------------------------|----------------|
| Intercept               | 4.75 (4.50 to 5.01)                                             | < .001         |
| Preoperative day        | reference                                                       | .              |
| First postoperative day | -0.60 (-0.84 to -0.36)                                          | < .001         |
| ICU discharge           | -0.27 (-0.50 to -0.03)                                          | .03            |
| Hospital discharge      | 0.12 (-0.16 to 0.39)                                            | .39            |
| Control group           | reference                                                       | .              |
| NMES group              | -0.04 (-0.32 to 0.25)                                           | .80            |

*MRC* Medical Research Council, *CI* confidence interval, *NMES* neuromuscular electrical stimulation, *ICU* intensive care unit

<sup>a</sup> Quadriceps mean MRC was calculated as mean of hip flexion and knee extension of both sides. According to the MRC scale [29], mean MRC score ranges from a minimum of 0 to a maximum of 5 points.
