# Supplementary figures and images for: Muscle mass, strength and functional outcomes in critically ill patients after cardiothoracic surgery: does neuromuscular electrical stimulation help? The Catastim 2 randomized controlled trial
Source: Springer Nature journal article supplement (doi:10.1186/s13054-016-1199-3), 2016-01-29

NMES group

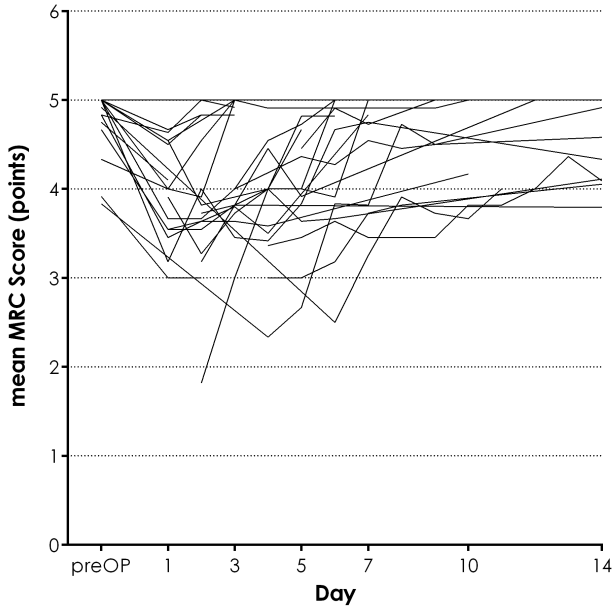

Control group

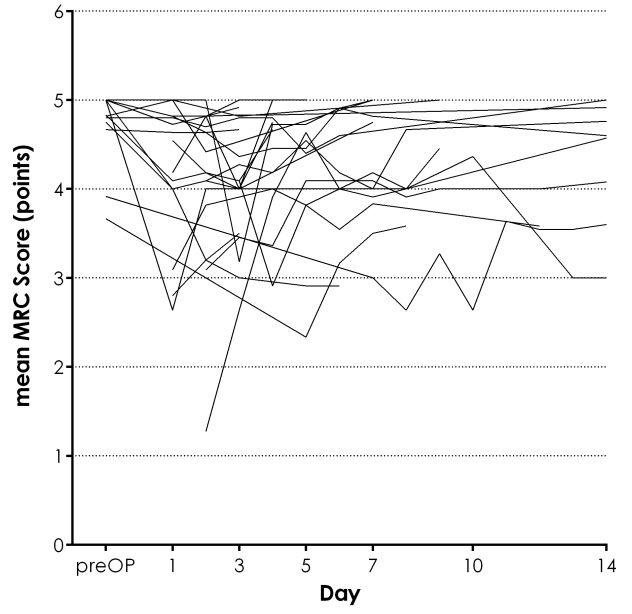

NMES group

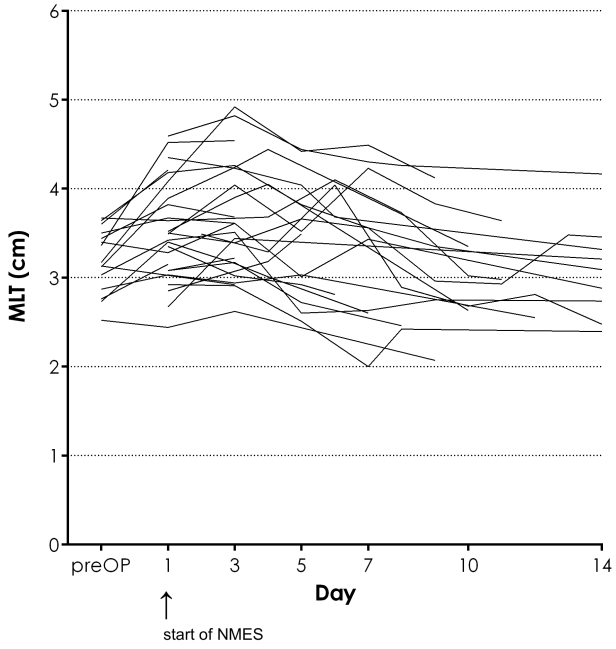

Control group

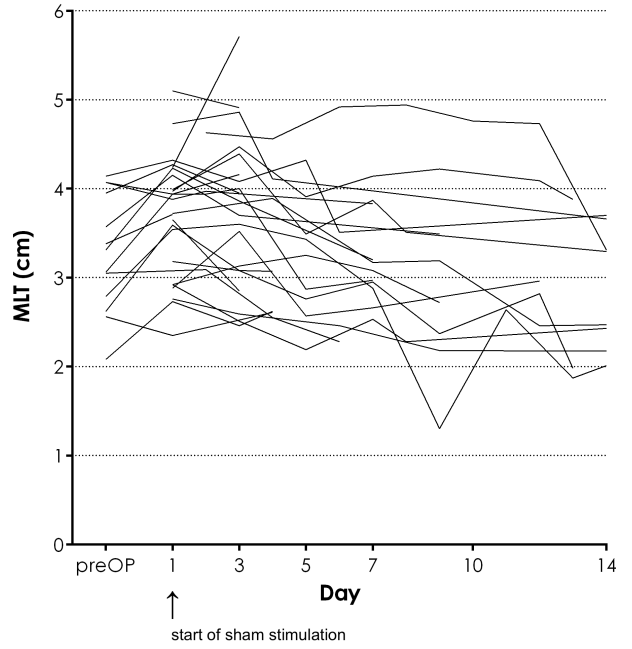

Supplement: MOESM2 [file 9781012]
